# Supplementary material for: Thioester synthesis through geoelectrochemical CO2 fixation on Ni sulfides
Source: PubMed Central journal article supplement (PMC9814748; doi:10.1038/s42004-021-00475-5), 2021-03-17
Supplement: 42004_2021_475_MOESM2_ESM.pdf [file 42004_2021_475_MOESM2_ESM.pdf]

## Description of Additional Supplementary Files

File Name: Supplementary Movie 1

Description: Demonstration of the surface-bound CO on the NiS\_PERM prepared at  $-1.0 V_{SHE}$ . 1 M  $H_3PO_4$  was added into serum bottles containing 50 mg of pure NiS (left) or the NiS\_PERM (right).
